# Supplementary material for: Inclusion of size controlled gallium oxide nanoparticles into highly ordered 3D mesoporous silica with tunable pore diameters and their unusual catalytic performance
Source: Royal Society of Chemistry journal article supplement (doi:10.1039/c0jm02006k), 2010-01-01
Supplement: c0jm02006k.pdf [file c0jm02006k.pdf]

Supporting Information:

*H. Oveisi, C. Anand, A. Mano, Salem S. Al-Deyab, P. Kalita, A. Beitollahi, and A. Vinu\**

**Inclusion of Size Controlled Gallium Oxide Nanoparticles into Highly Ordered 3D Mesoporous Silica with Tunable Pore Diameters and their Unusual Catalytic Performance**

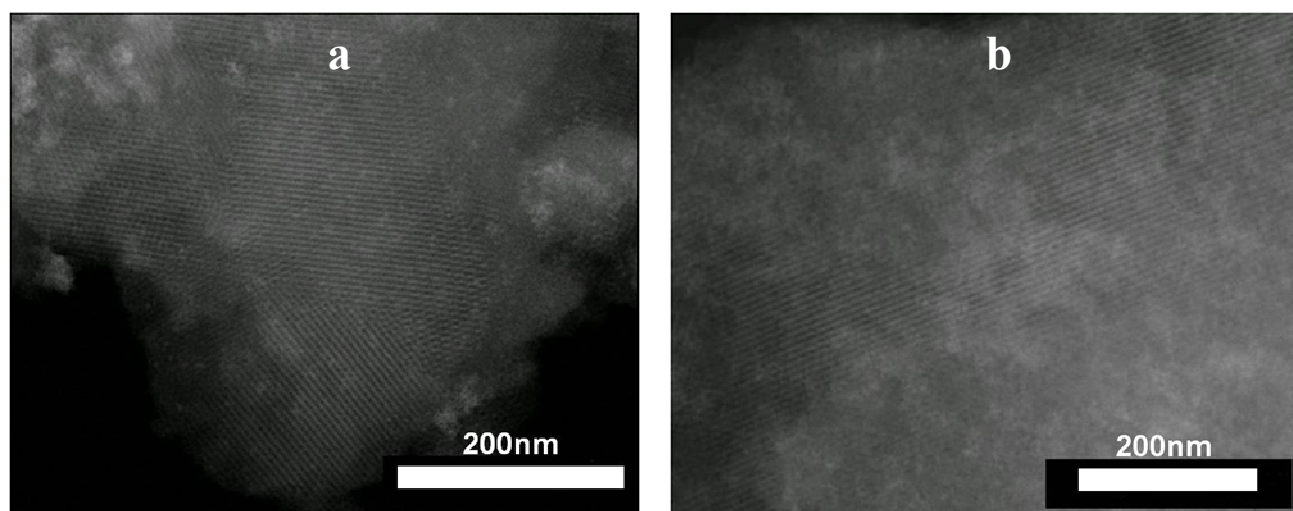

**Figure S 1:** STEM images of KIT-6-100-30G and KIT-6-150-30G.

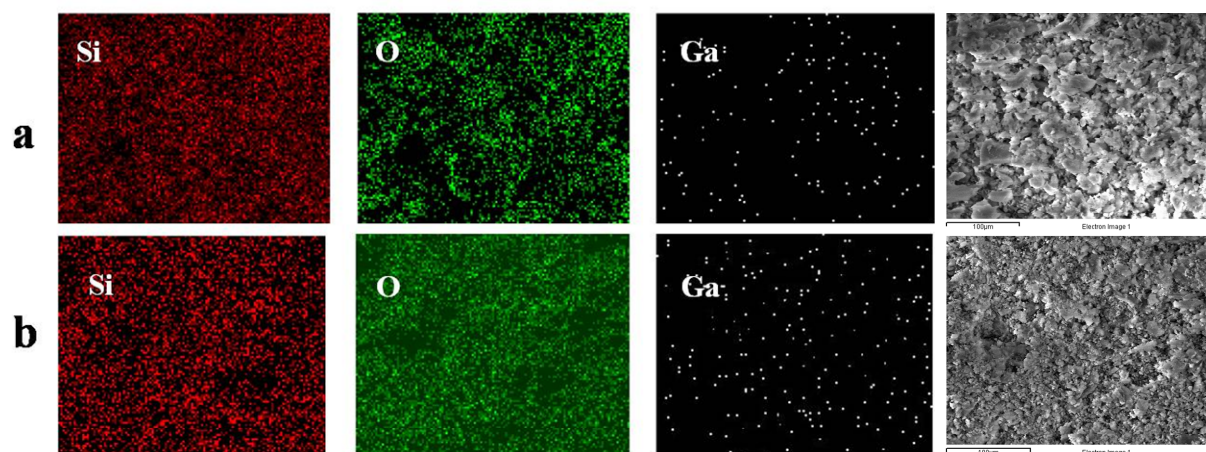

Figure S2: Elemental mapping and the corresponding SEM images of a) KIT-6-150-5G, and b) KIT-6-150-30G.
